# Supplementary material
Source: PubMed Central journal article supplement (PMC4268419)
Supplement: NIHMS614902-supplement-s_figure_1.pdf [file NIHMS614902-supplement-s_figure_1.pdf]

ACTIN GALECTIN-3

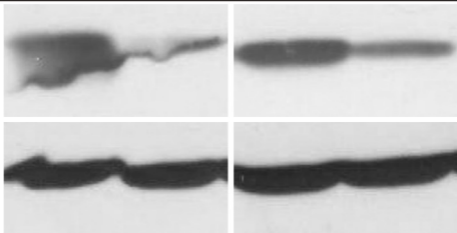

dk dk med med  
sh<sup>-</sup> Gal<sup>-</sup> sh<sup>-</sup> Gal<sup>-</sup>

MELANIN (ng)/PROTEIN (ug)

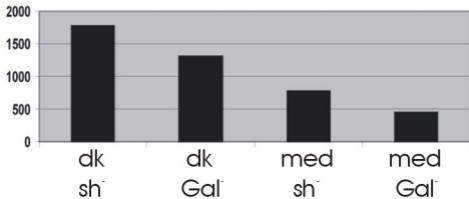

Cultured melanocytes derived from dark (dk) and medium (med) pigmented skins were silenced with mock (sh<sup>-</sup>) or galectin-3 (Gal<sup>-</sup>) shRNA. Both galectin-3 expression (top) and total melanin (bottom) were moderately reduced in the galectin-3 silenced melanocytes.
