# Supplementary material
Source: PubMed Central journal article supplement (PMC4268419)
Supplement: NIHMS614902-supplement-s_table_2.pdf [file NIHMS614902-supplement-s_table_2.pdf]

TABLE 2 – Quantification of galectin-3 co-expression of BLOC2 & BLOC3

|              | <b>% of cellular area of the HPS protein</b> | <b>% of cellular area of Galectin-3</b> | <b>% of Gal-3 co-localizing with HPS</b> |
|--------------|----------------------------------------------|-----------------------------------------|------------------------------------------|
| <b>HPS-1</b> | 44.1+20*                                     | 43.0+20                                 | 59.8+9                                   |
| <b>HPS-5</b> | 21.0+10                                      | 50.0+17                                 | 91.1+9                                   |
| t-test       | 0.00014                                      | 0.23295                                 | 6.462E-09                                |

\* = standard deviation
